# Supplementary material for: NHR-23 activity is necessary for C. elegans developmental progression and apical extracellular matrix structure and function
Source: Oxford University Press journal article supplement (doi:10.1242/dev.201085), 2023-05-02
Supplement: dev201085supp.pdf [file dev201085supp.pdf]

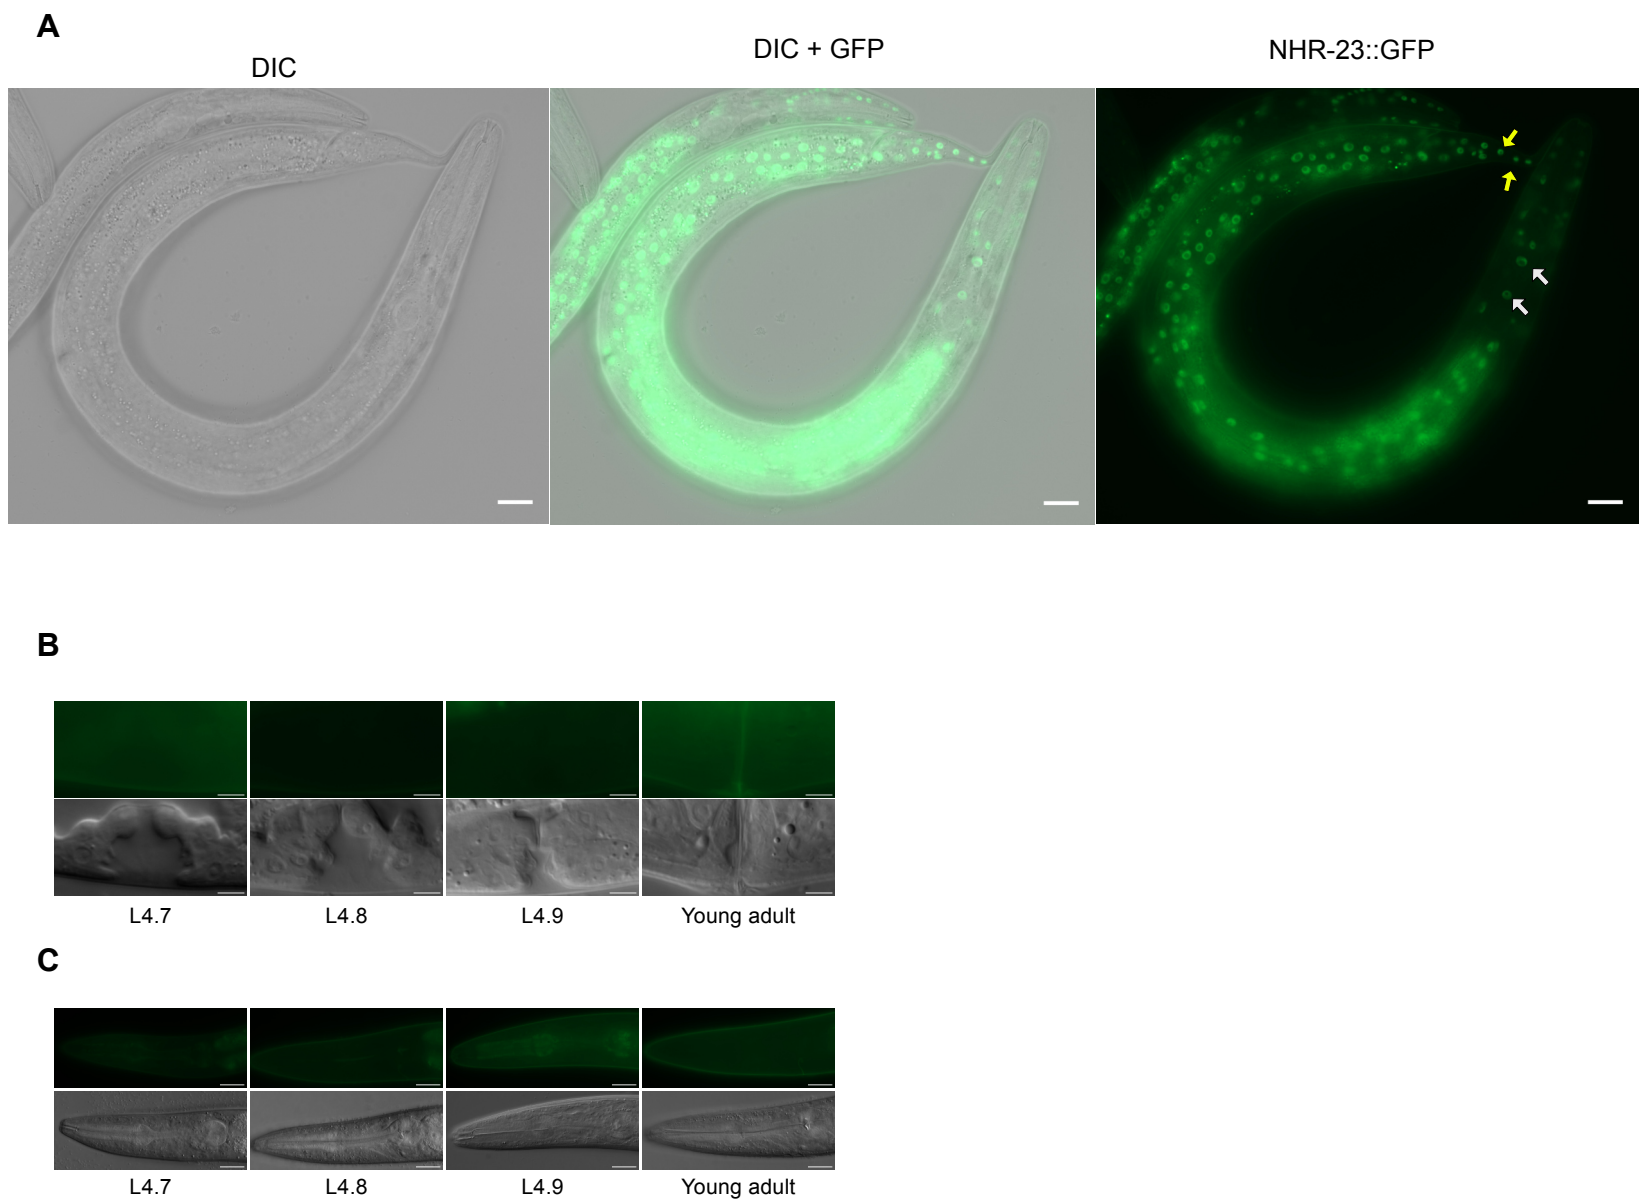

**Fig. S1. NHR-23::GFP expression.** (A) Representative image of NHR-23 expression in *nhr-23::GFP::AID\*::3xFLAG; TIR-1* L4 animals. NHR-23 expression is seen in the hypodermis and developing germline, as described in Ragle et al. 2020. White arrows point to seam cells expressing GFP and yellow arrows point to hyp cells expressing GFP. NHR-23 expression in the vulva (B) and head (C) of *nhr-23::GFP::AID\*::3xFLAG* animals of the indicated stages. Images are representative of 20 animals examined over 4 independent experiments. Scale bars=5  $\mu$ m (B) or 20  $\mu$ m (C). Animals were staged based on vulval morphology (Mok et al., 2015).

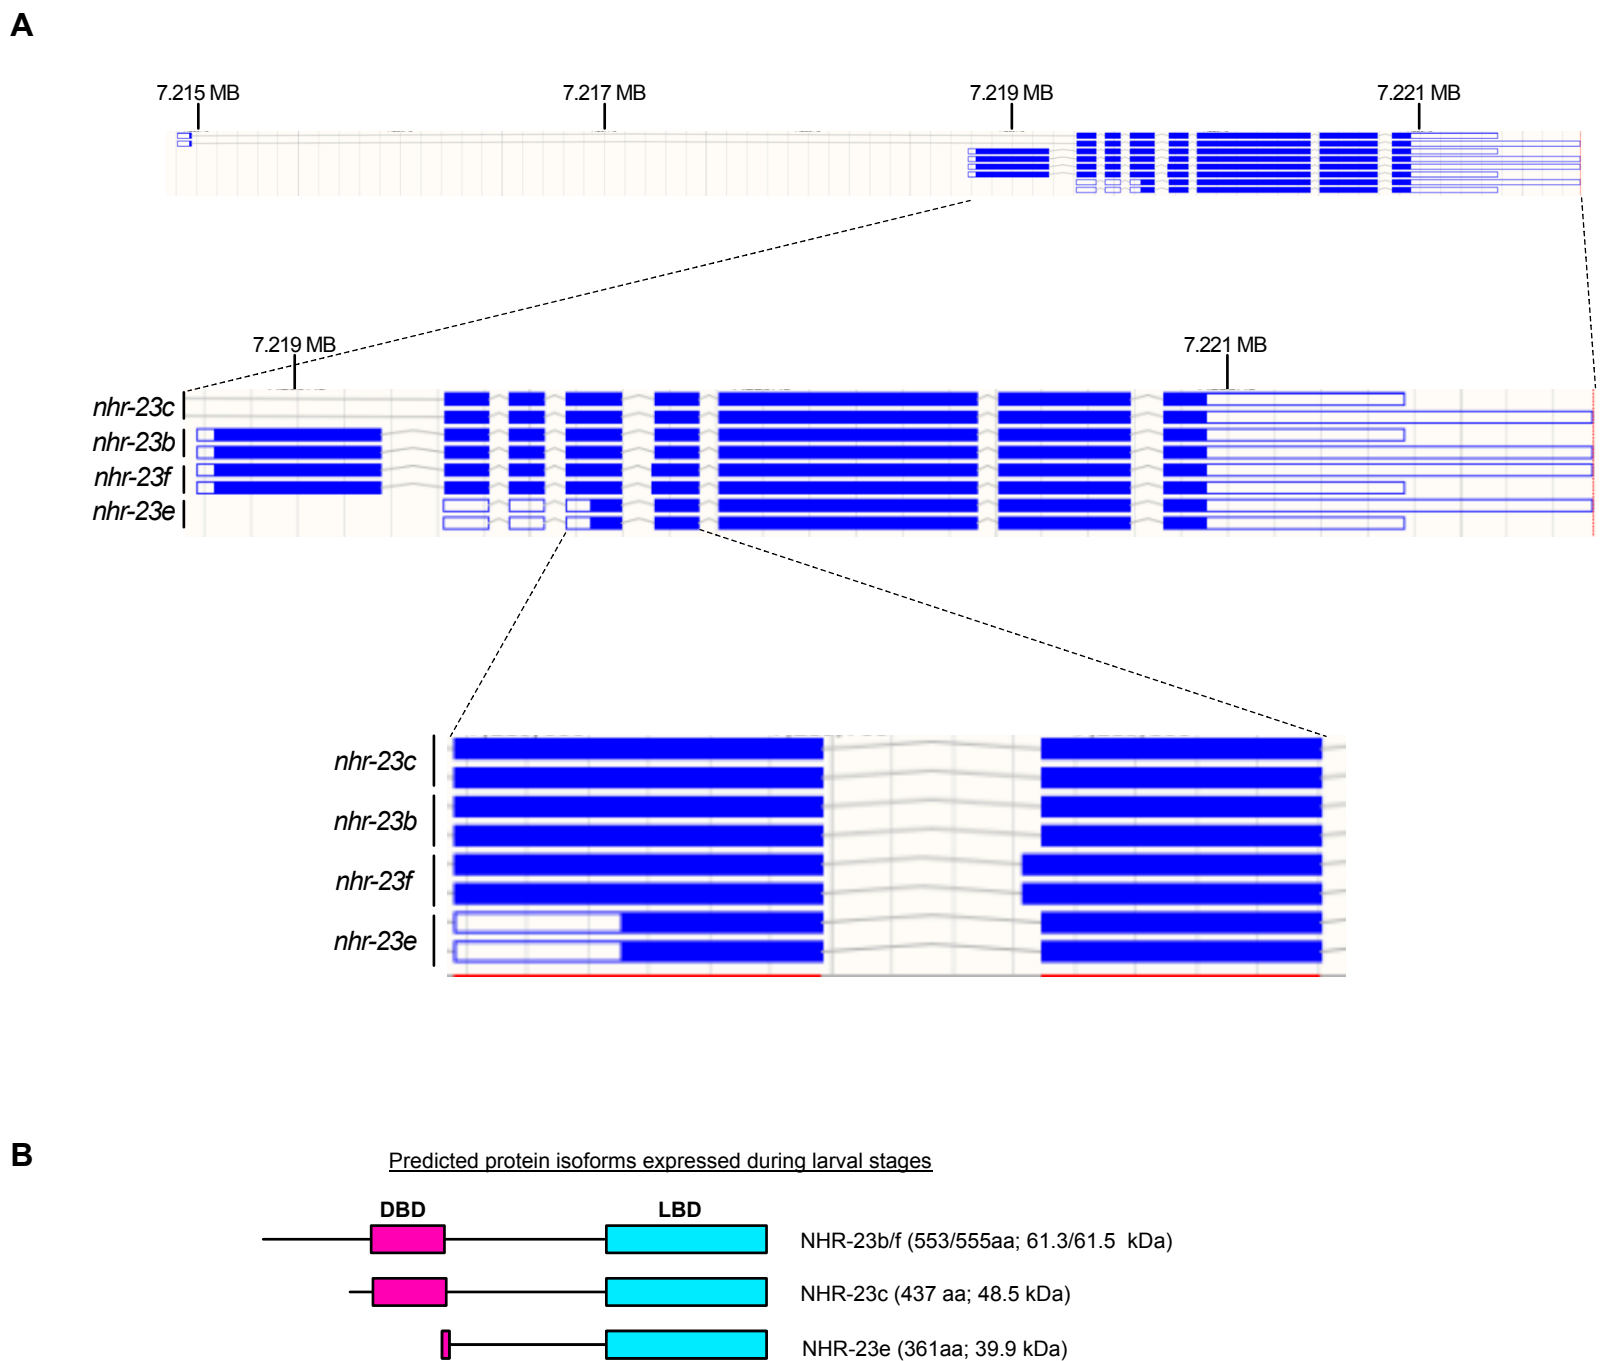

**Fig. S2. *nhr-23* isoforms detected by Nanopore direct mRNA sequencing.** (A) Gene model diagrams of the *nhr-23* isoforms from the “observed isoforms” track on the ENSEMBL genome track. These are isoforms confirmed by direct mRNA sequencing (Roach et al., 2020). The top tracks are of the full *nhr-23* gene, including the *nhr-23c* isoforms, which contain a large first intron. The middle tracks are a zoomed in view starting at the *nhr-23b* transcription start site. The bottom tracks are further zoomed in to depict the alternative 3' splice site usage that generates *nhr-23b* and *nhr-23f*. (B) Cartoons of predicted protein isoforms expressed during larval development based on Nanopore direct mRNA sequencing data (Roach et al., 2020). All of the predicted isoforms contain a Ligand Binding Domain (LBD) while only two of the three have a DNA Binding Domain (DBD). The predicted size of each isoform is listed to the right of the structure in amino acids (aa) and kDa. The AID\*::3xFLAG fusion is predicted to add 9 kDa.

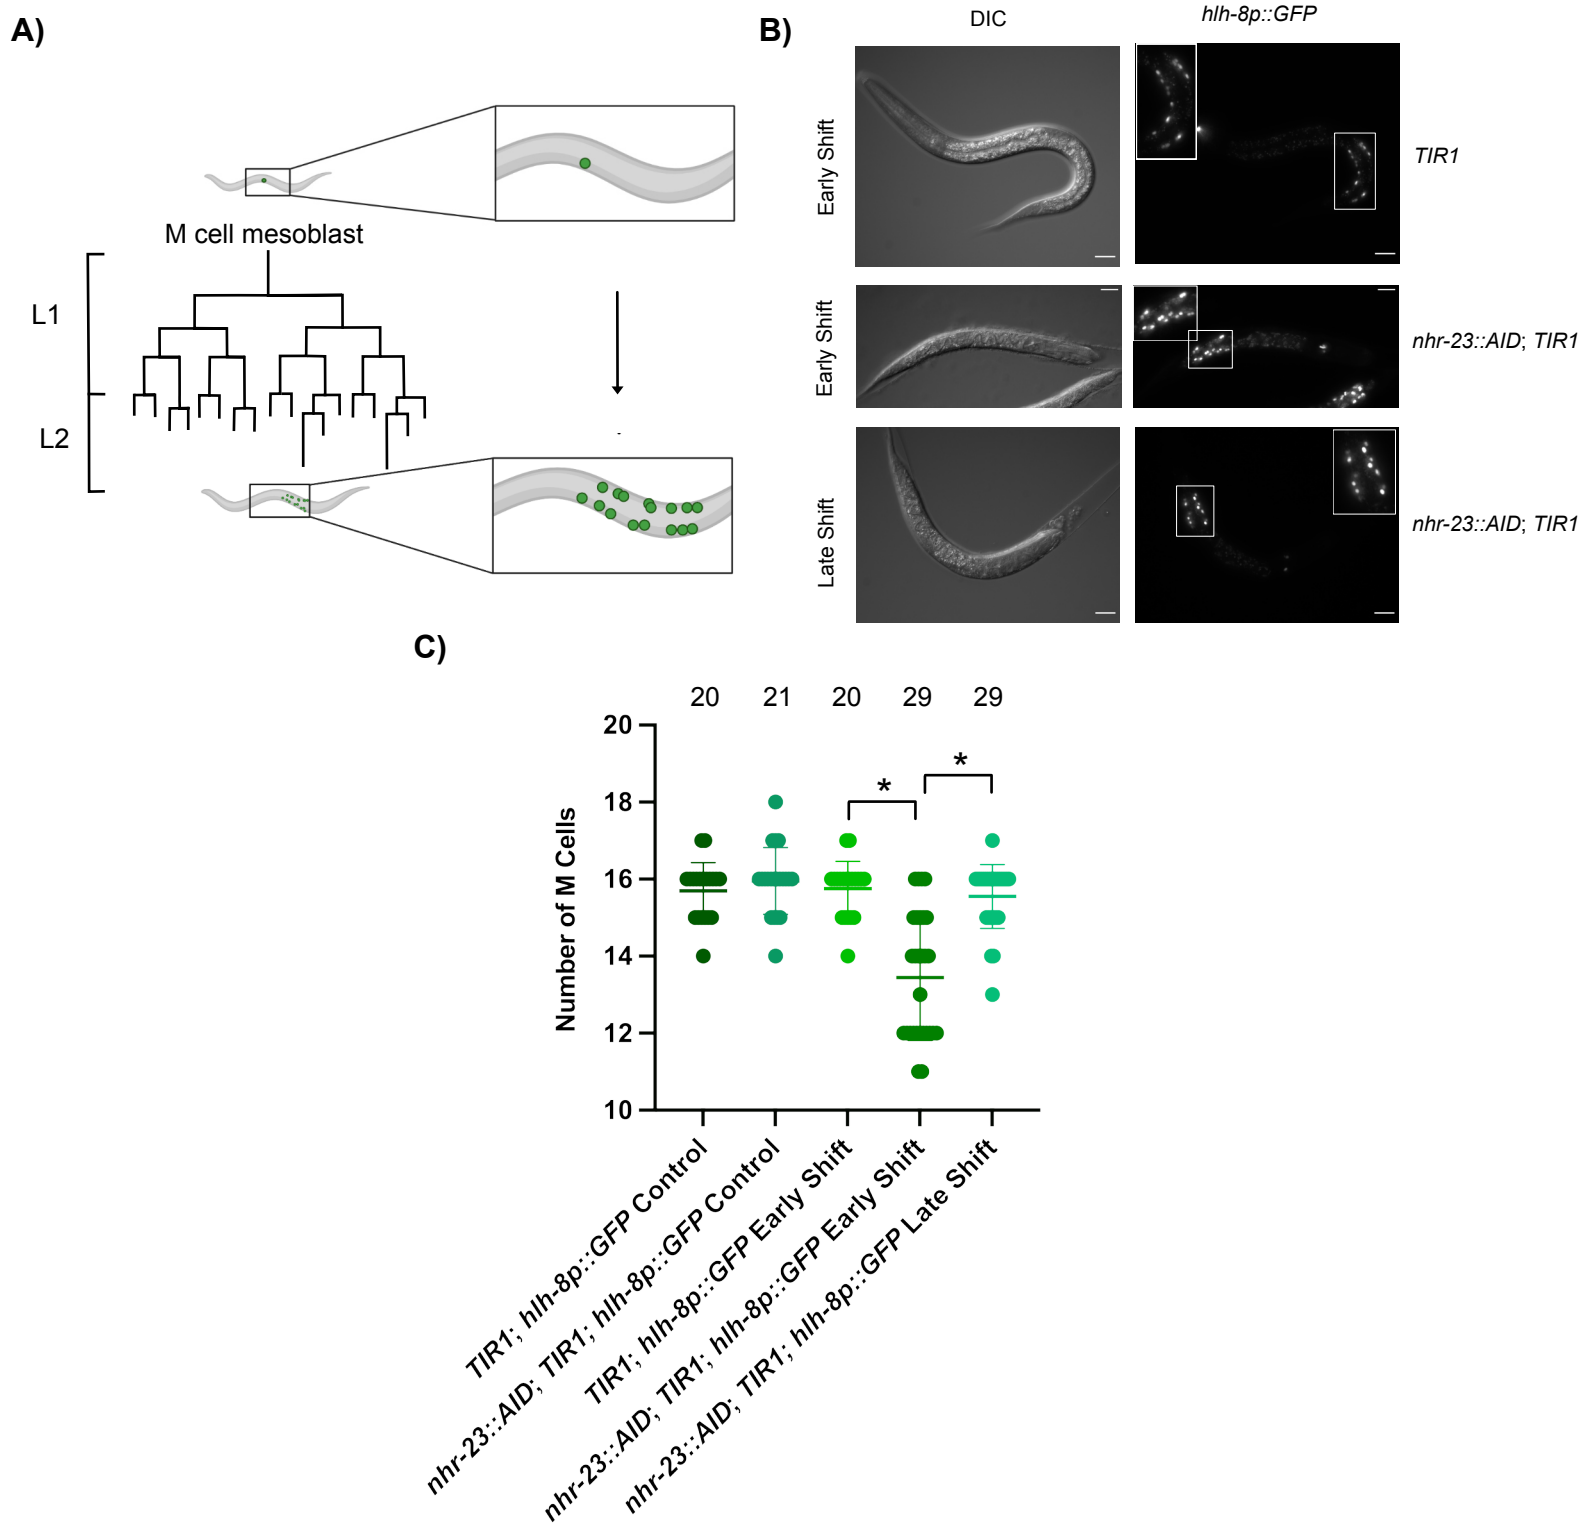

**Fig. S3. NHR-23 depletion causes developmental delay** (A) Depiction of the M cell mesoblast cell divisions in L1 larvae created with BioRender.com. Newly hatched animals are born with a single M cell, which undergoes the indicated set of divisions to produce 16 descendent cells at the L1/L2 molt. An *hlh-8p::GFP* reporter can be used to monitor M cell divisions in living animals. (B and C) Animals of the indicated genotype were synchronized and shifted to either auxin or control plates at either 3 (early shift) or 9 hours (late shift) post-release and imaged at 24 hours post-release. Two biological replicates were performed. (B) Representative images of animals of the indicated genotypes on auxin plates. (C) M cell quantification for animals of the indicated genotype shifted to control or auxin plates. Mean and standard deviation are labeled. The number of animals assayed for each genotype and condition is indicated at the top of the graph (\* two-tailed T-test  $p < 0.0001$ ).

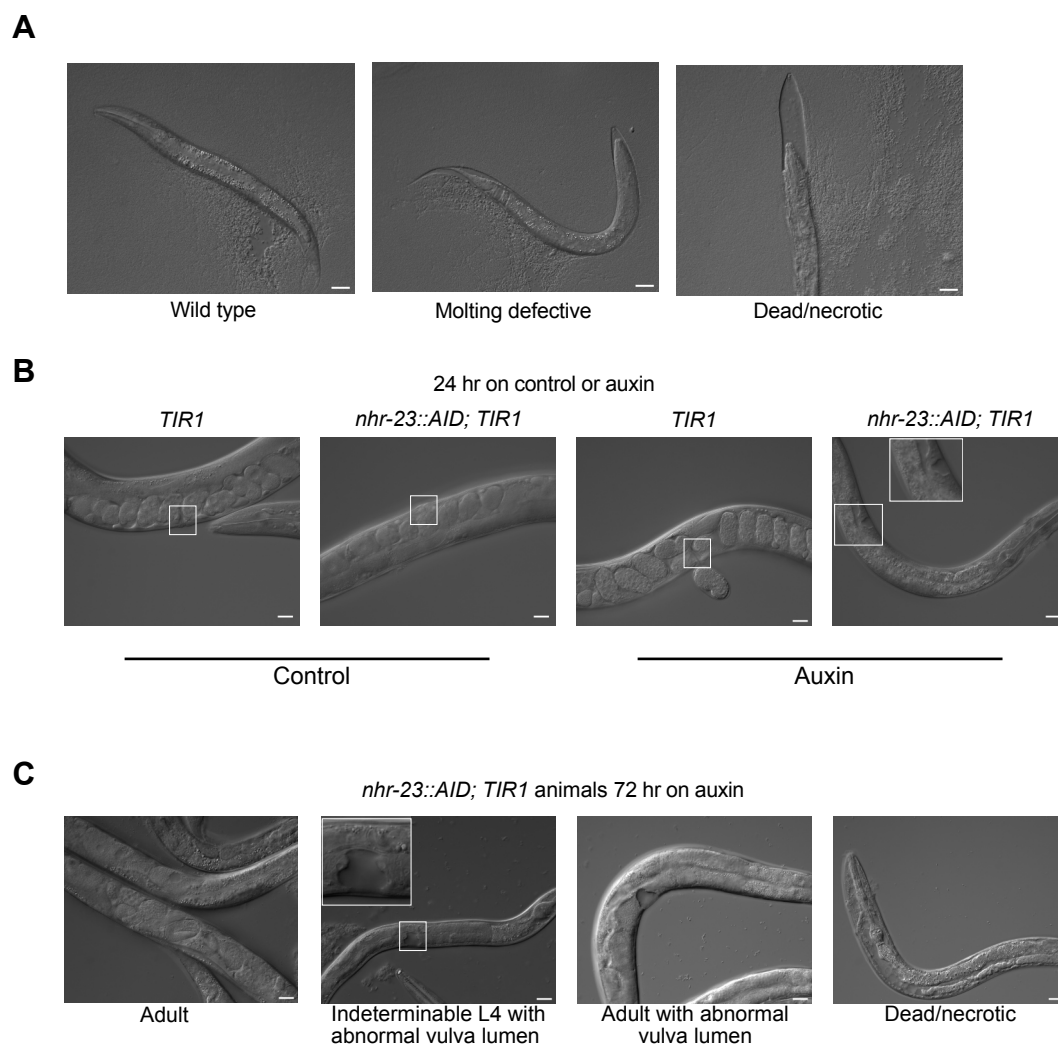

**Fig. S4. NHR-23 depletion causes developmental delay.** (A) Representative images of synchronized *nhr-23::AID; TIR1* L1 larvae released on auxin and scored for molting defects and death/necrosis 72 hours post-release. (B) Representative images of animals of the indicated genotype that were synchronized and shifted onto auxin at 25 hours post-release and imaged 23 hours later (48 hours post-release). The position of the vulva is highlighted with a white box. (C) Representative images of *nhr-23::AID; TIR1* animals treated as in (B) and scored after 72 hours on auxin. Scale bars=20  $\mu$ m. A zoomed inset is provided for the auxin-treated *nhr-23::AID, TIR1* images in B and C to highlight vulval morphology.

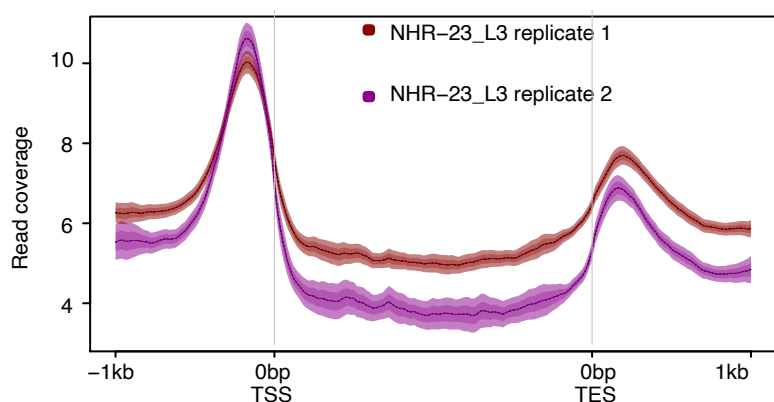

**Fig. S5. NHR-23 enrichment around genes.** Average signal over all aligned genes from two NHR-23 ChIP-seq replicates (Gerstein et al., 2010). The y-axis indicates non-normalized read coverage. The mean signal is plotted with a line and the mean's 95% confidence interval is indicated by the shaded area. TSS=transcription start site; TES=transcription end site.

**A**

| Strain | Genotype                                           | Brood size ( $\pm$ std. dev.) |
|--------|----------------------------------------------------|-------------------------------|
| N2     | Wild type                                          | 290 $\pm$ 48                  |
| JDW459 | <i>nhr-23::AID; TIR1, rol-6::mNG::3xFLAG</i>       | 293 $\pm$ 48                  |
| JDW463 | <i>nhr-23::AID; TIR1, bli-1::mNG::3xFLAG(int)</i>  | 236 $\pm$ 56                  |
| JDW475 | <i>noah-1::mNG::3xFLAG(int), nhr-23::AID; TIR1</i> | 246 $\pm$ 27                  |

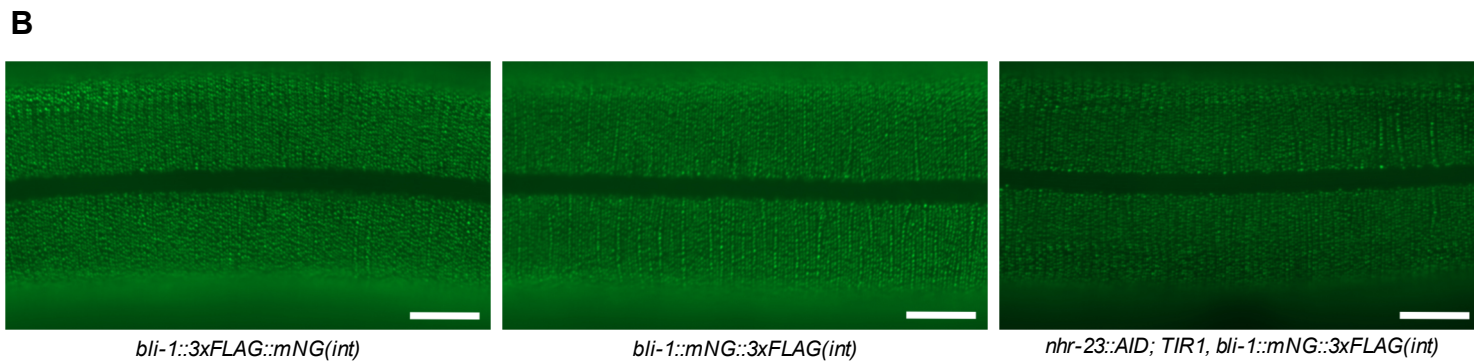

**Fig. S6. Validation of *bli-1*, *noah-1*, and *rol-6* knock-in strains.** (A) Brood size analysis of animals of the indicated genotype. (B) Representative images from L4.9 stage CZ27591 *bli-1(ju1789[bli-1::3xFLAG::mNG(int)]) II*, JDW389 *bli-1(wrd84[bli-1::mNG::3xFLAG(int)]) II*, and JDW463 *nhr-23(kry61(nhr-23::AID\*-TEV-3xFLAG)) I; ieSi57 [Peft-3::TIR1::mRuby::unc-54 3'UTR, cb-unc-119(+)]*, *bli-1(wrd84[bli-1::mNG::3xFLAG(int)])* animals. Equal 500 msec exposures from the same area of animals were taken using a 100x objective. Knock-ins are all at the same location in *bli-1* (see Fig. 6A). Scale bars=10  $\mu$ m. Images are representative of 40 animals examined in two independent experiments.



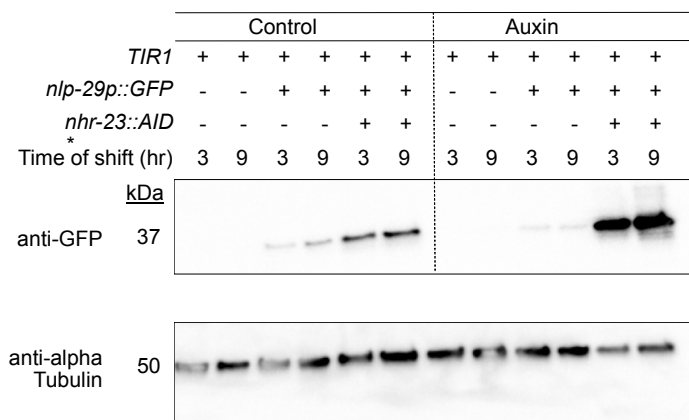

**Fig. S7. Depletion of NHR-23 leads to an elevated *nlp-29p::GFP* reporter activity.** Anti-GFP immunoblot analysis of *nlp-29p::GFP* expression. Marker size (in kDa) is provided. An anti-tubulin immunoblot is provided as a loading control. The blots are representative of two experimental replicates.

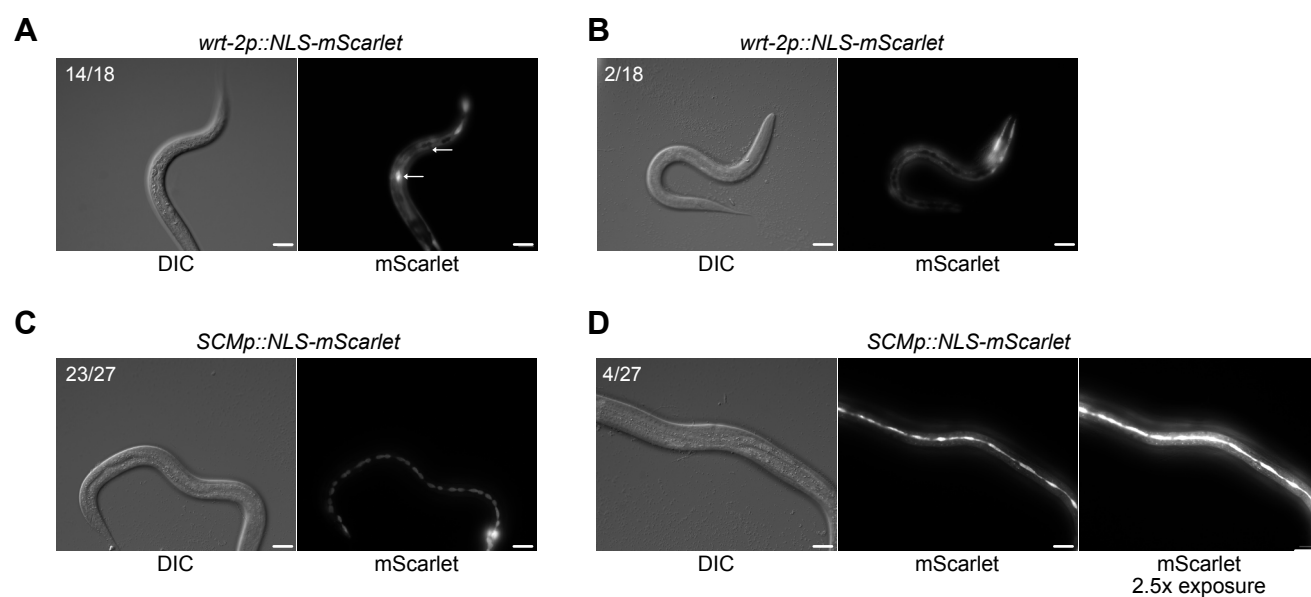

**Fig. S8. Expression patterns of *SCMp* and *wrt-2* promoter reporters.** *wrt-2p::NLS::mScarlet* is expressed in the hypodermis and seam cells (A and B). In some animals seam cell expression is lacking. In A, arrows point to two seam cells, one with reporter expression and one lacking it. *SCMp::NLS::mScarlet* promoter reporters express robustly in the seam cells (C) with weak expression in the hypodermis (D) in a subset of animals. Two biological replicates were performed and the number of animals for which each image is representative is indicated.

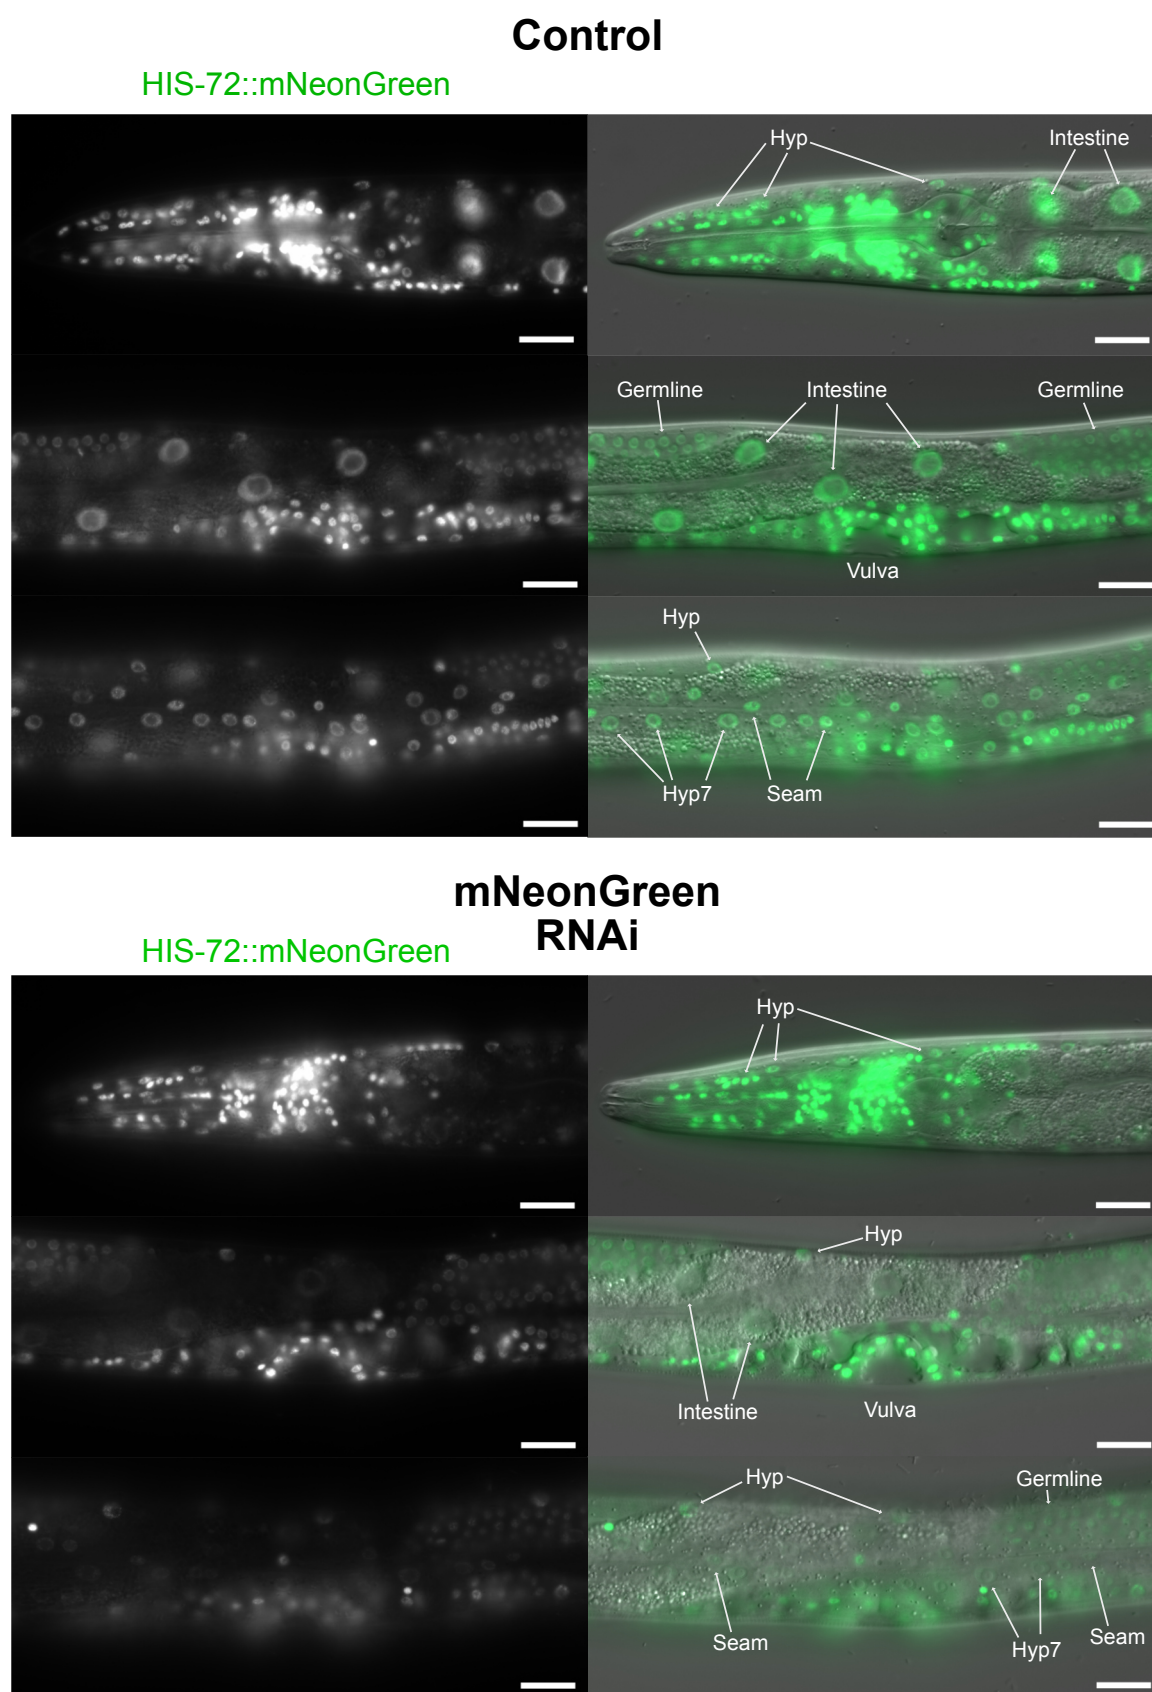

**Fig. S9. JDW525 animals are permissive for RNAi knockdown in seam, hypodermal, and intestinal cells.** JDW 525 [*his-72(wrd142[mNeonGreen::his-72]) III ; jsTi1493 {mosL loxP [ wrdSi65(SCMp::rde-1 CDS +3'UTR)] FRT3::mosR} IV ; rde-1 (ne300) V*] animals grown on control RNAi display HIS-72::mNG expression in hypodermal, intestinal, germline, vulval, and seam cells. mNeonGreen RNAi caused reduction of HIS-72::mNG expression in seam, intestinal, and syncytial hypodermal (*hyp7*) cells. Vulval, germline, and head hypodermal expression was unaffected. Scale bars=20µm. Data are representative of forty animals examined over two biological replicates

**Table S1. *TIR1*, *nhr-23::GFP::AID\*::3xFLAG* has milder developmental delay than *TIR1*, *nhr-23::AID\*::3xFLAG* on auxin**

| Genotype                               | Treatment | N   | % Developmental delay |
|----------------------------------------|-----------|-----|-----------------------|
| <i>TIR1; nhr-23::AID*::3xFLAG</i>      | Control   | 296 | 0.34                  |
|                                        | Auxin     | 237 | 100.00                |
| <i>TIR1; nhr-23::GFP::AID*::3xFLAG</i> | Control   | 259 | 0.39                  |
|                                        | Auxin     | 257 | 7.62                  |

Animals were synchronized by a timed egg lay. Percent developmental delay is the number of animals that failed to reach L4 after 48 hours at 25°C divided by the total number of animals scored, multiplied by 100%.

**Table S2. *nhr-23*-regulated oscillating and non-oscillating genes**

[Click here to download Table S2](#)

**Table S3. Gene ontology analysis of NHR-23-regulated oscillating genes**

| Gene Ontology (GO) term | Description                                                    | Enrichment | q-value  |
|-------------------------|----------------------------------------------------------------|------------|----------|
| GO:0042302              | structural constituent of cuticle                              | 7.54       | 2.23E-07 |
| GO:0042329              | structural constituent of collagen and cuticulin-based cuticle | 31.06      | 1.80E-05 |
| GO:0005198              | structural molecule activity                                   | 3.21       | 6.33E-03 |
| GO:0004867              | serine-type endopeptidase inhibitor activity                   | 5.73       | 3.97E-01 |
| GO:0008237              | metallopeptidase activity                                      | 3.78       | 3.37E-01 |

Enrichment: observed/expected occurrence of a GO term in the *nhr-23*-regulated gene set  
q value: p value adjusted for false discovery rate

**Table S4. Gene ontology analysis of all oscillating genes**

[Click here to download Table S4](#)

**Table S5. NHR-23 ChIP-seq peaks broken down by position relative to coding sequence.**

[Click here to download Table S5](#)



**Table S6. crRNAs used for this study**

| Number | Target                         | crRNA sequence (5'-3', PAM not included) |
|--------|--------------------------------|------------------------------------------|
| 1      | <i>his-72</i> N-terminus       | GGTACGAGCCATTGTTGTTTC                    |
| 51     | <i>noah-1</i> internal         | GTTGAGTGTGCTTTAACCGG                     |
| 318    | <i>bli-1</i> internal knock-in | AGATTCATCTTCTGCAGCTT                     |
| 351    | <i>rol-6</i> C-terminus        | GTCATGAATTTGTCTACAAT                     |

**Table S7. PCR primers used for knock-ins and genotyping.**

[Click here to download Table S7](#)

**Table S8. Plasmids used in this study**

| Plasmid  | Cloning approach | Source              | Purpose                                                                                                                                                 |
|----------|------------------|---------------------|---------------------------------------------------------------------------------------------------------------------------------------------------------|
| pLF3FShC | N/A              | Nonet, 2020         | Integration vector for RMCE                                                                                                                             |
| pJW849   | Gibson           | This study          | <i>wrt-2p::NLS-mScarlet (dpi)::tbb-2 3'UTR</i> promoter reporter                                                                                        |
| pJW1841  | N/A              | Ashley et al., 2021 | promoterless <i>NLS::mScarlet (dpi)::tbb-2 3'UTR</i> vector                                                                                             |
| pJW1940  | Gibson           | This study          | <i>SCMp::NLS-mScarlet (dpi)::tbb-2 3'UTR</i> promoter reporter                                                                                          |
| pJW2172  | N/A              | Ashley et al., 2021 | 30xlinker:mNeonGreen (dpi)::3xFLAG::10xlinker repair template                                                                                           |
| pJW2247  | Gibson           | This study          | Promoterless <i>rde-1 CDS+3'UTR</i> in RMCE integration vector. Linearize vector with BsiWI and AvrII double digestion to Gibson clone in new promoters |
| pJW2236  | Gibson           | This study          | <i>SCMp::rde-1 CDS+3'UTR</i> in RMCE integration vector for seam cell-specific RNAi                                                                     |
| pJW2264  | Gibson           | This study          | <i>semo-1p::rde-1 CDS+3'UTR</i> in RMCE integration vector for hypodermis-specific RNAi                                                                 |
